# Supplementary material for: Isolation and Characterization of Antimicrobial Peptides with Unusual Disulfide Connectivity from the Colonial Ascidian Synoicum turgens
Source: PubMed Central journal article supplement (PMC7024374; doi:10.3390/md18010051), 2020-01-12
Supplement: marinedrugs-18-00051-s001.pdf [file marinedrugs-18-00051-s001.pdf]

## Supporting information

# Isolation and characterization of antimicrobial peptides with unusual disulfide connectivity from the colonial ascidian *Synoicum turgens*

Ida K. Ø. Hansen <sup>1</sup>, Johan Isaksson <sup>2</sup>, Aaron G. Poth<sup>3</sup>, Kine Ø. Hansen <sup>4</sup>, Aaron J. C. Andersen <sup>1</sup>, Céline S. Richard <sup>1</sup>, Hans-Matti Blencke<sup>1</sup>, Klara Stensvåg<sup>1</sup>, David J. Craik<sup>3</sup> and Tor Haug <sup>1</sup>

- <sup>1</sup> Norwegian College of Fishery Science, Faculty of Biosciences, Fisheries and Economics, UiT The Arctic University of Norway, Breivika, N-9037 Tromsø, Norway
- <sup>2</sup> Department of Chemistry, UiT The Arctic University of Norway, Breivika, N-9037 Tromsø, Norway
- <sup>3</sup> Institute for Molecular Bioscience, The University of Queensland, Brisbane 4072, Queensland, Australia
- <sup>4</sup> Marbio, UiT The Arctic University of Norway, Breivika, N-9037, Tromsø, Norway

### Table of contents

- Figure S1.** MS spectra of the isotope patterns of the purified peptides
- Figure S2.** MS/MS spectra of the intact peptides of turgencin A and turgencin A<sub>Mox1</sub>
- Figure S3.** MS/MS spectrum highlighting the different oxidation states of turgencin B
- Figure S4.** Retention times of turgencin A, B and their oxidized derivatives
- Figure S5.** <sup>15</sup>N-HSQC (at natural abundance) of turgencin A<sub>Mox1</sub> in water
- Figure S6.** <sup>15</sup>N-HSQC (at natural abundance) of turgencin B<sub>Mox2</sub> in water
- Figure S7.** TALOS+ predicted secondary structure of turgencin B<sub>Mox2</sub>
- Figure S8.** The <sup>3</sup>J<sub>HNHA</sub> coupling constants of turgencin B<sub>Mox2</sub>
- Figure S9.** Early test calculations of turgencin B<sub>Mox2</sub> using crude constraints to evaluate different disulfide patterns using crude constraints
- Figure S10.** The most viable alternative disulfide pattern of turgencin B<sub>Mox2</sub> compared to the found pattern in terms of energy
- Figure S11.** RMSD relative to the starting frame, energies of the turgencin B<sub>Mox2</sub> and the RMSF of the backbone during the free MD trajectory
- Figure S12.** Comparison of NMR and molecular dynamics structures for turgencin B<sub>Mox2</sub>
- Table S1.** Antimicrobial activity of solid phase extract fractions and the organic extract
- Table S2.** Calculated and measured monoisotopic *m/z* [M+4H]<sup>4+</sup> ions of the turgencins
- Table S3.** Proton chemical shift assignments for turgencin A<sub>Mox1</sub> in water
- Table S4.** Carbon chemical shift assignments for turgencin A<sub>Mox1</sub> in water
- Table S5.** Proton chemical shift assignments for turgencin B<sub>Mox2</sub> in water
- Table S6.** Carbon chemical shift assignments for turgencin B<sub>Mox2</sub> in water
- Table S7.** Peptides sharing the same disulfide connectivity as turgencin B

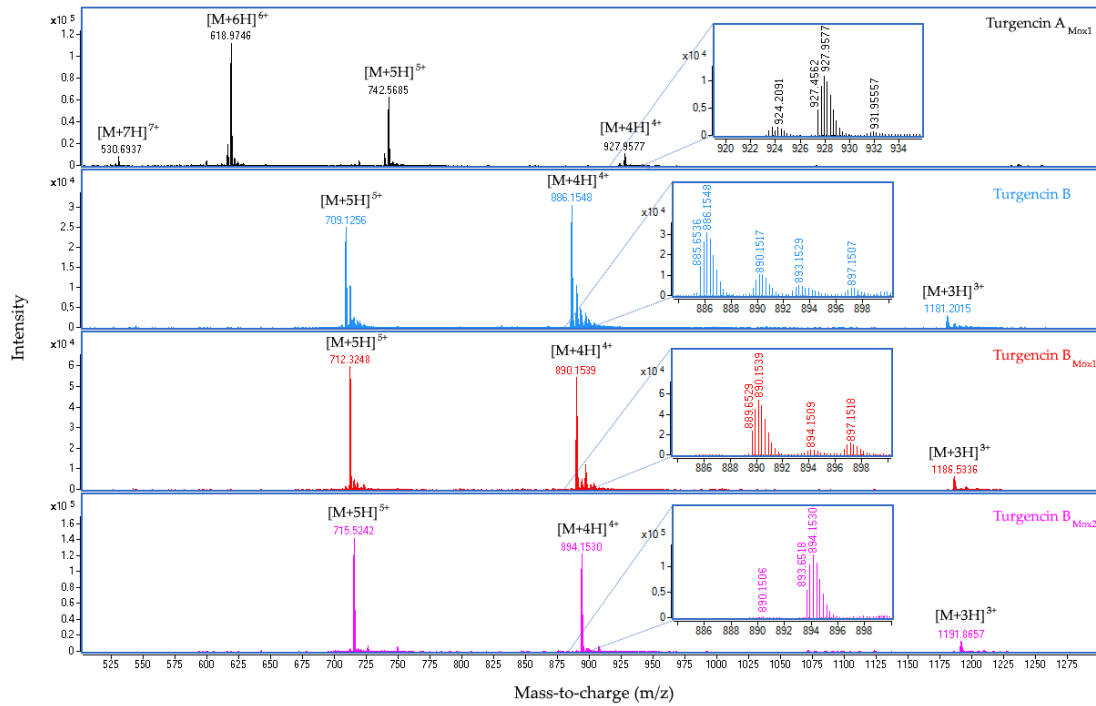

**Figure S1.** MS spectra of the isotope patterns of the purified peptides turgencin A<sub>Mox1</sub>, turgencin B, turgencin B<sub>Mox1</sub> and turgencin B<sub>Mox2</sub>. The  $[M+4H]^{4+}$  ions are highlighted, and the monoisotopic signals of these ions were used for calculation of the monoisotopic masses of the peptides.

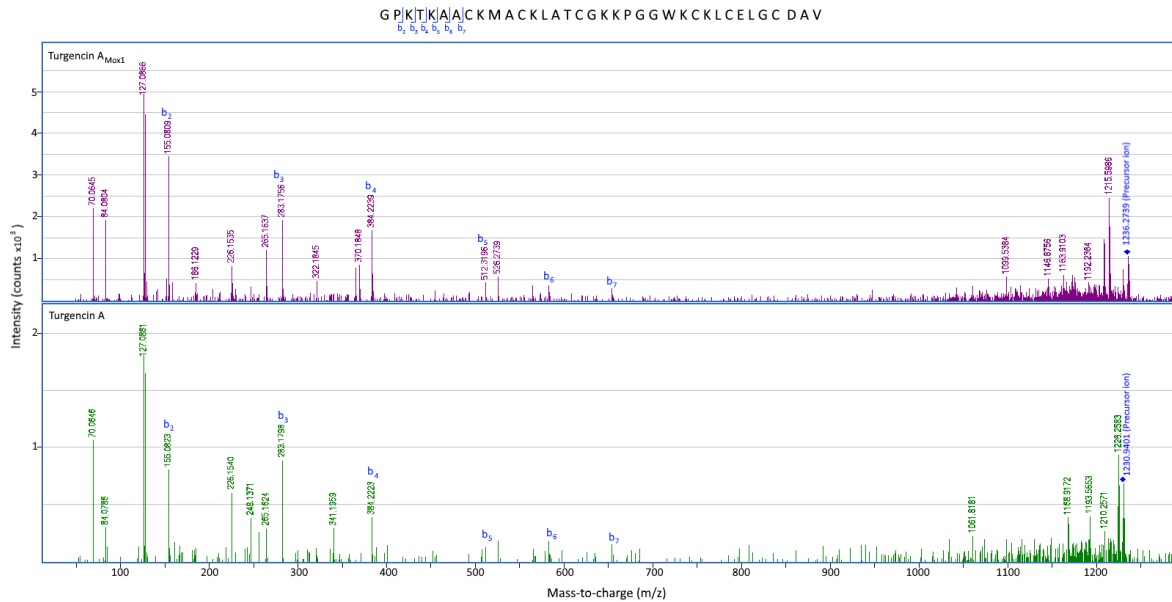

**Figure S2.** MS/MS spectra of the  $[M+3H]^{3+}$  precursor ions  $m/z$  1236.27 and  $m/z$  1230.94 of the intact peptides of turgencin A and turgencin A<sub>Mox1</sub> respectively.

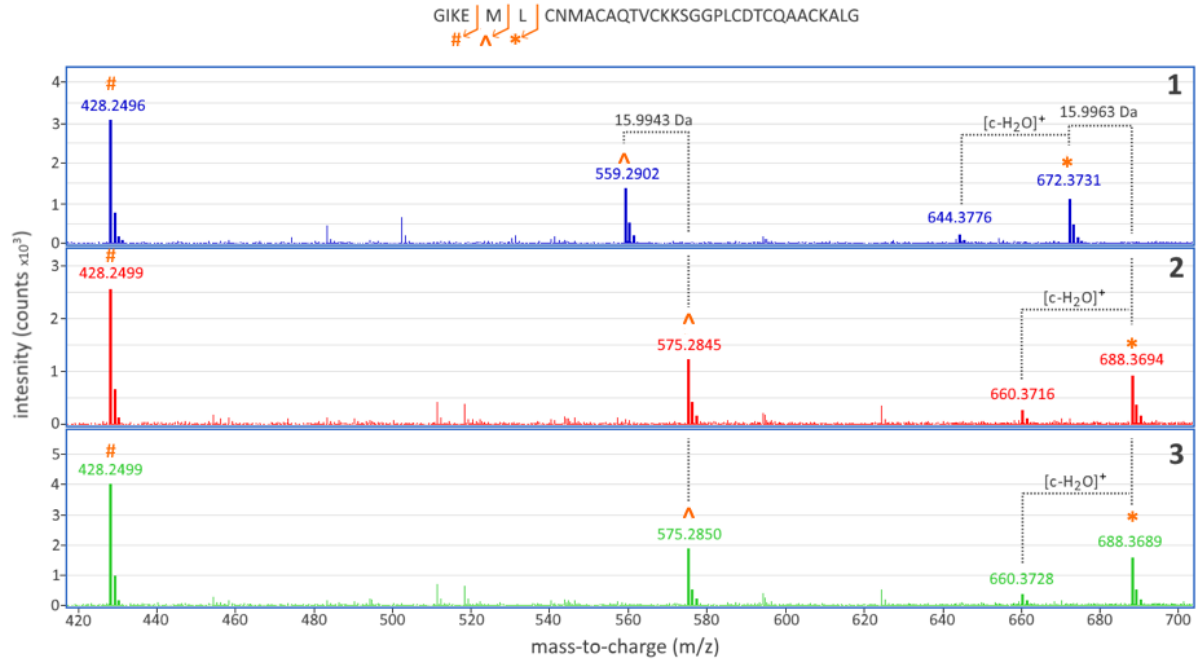

**Figure S3.** MS/MS spectra of the  $[M+4H]^{4+}$  precursor ions, highlighting the differing oxidation states of Met5 across three turgencin B oxiforms, zoomed in between  $m/z$  420-700. Spectrum 1 is of turgencin B (precursor  $m/z$  885.65), spectrum 2 illustrates the oxidation of turgencin B<sub>Mox1</sub> (precursor  $m/z$  889.65), and spectrum 3 is of turgencin B<sub>Mox2</sub> (precursor  $m/z$  893.65).

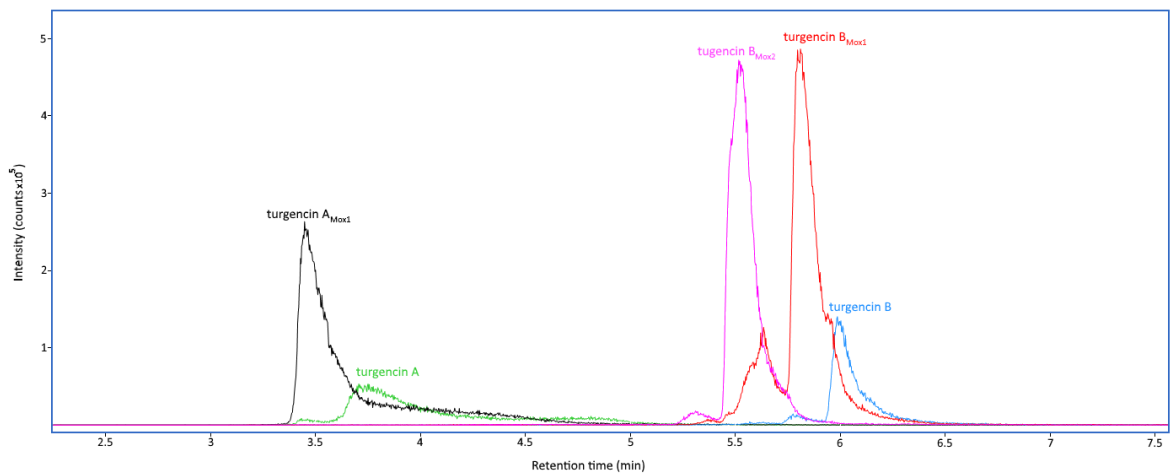

**Figure S4.** Reversed-phase HPLC separation of turgencin A, B and their oxidized derivatives. Peptides with methionine oxidation exhibit shorter retention times, corresponding with decreased hydrophobicity.

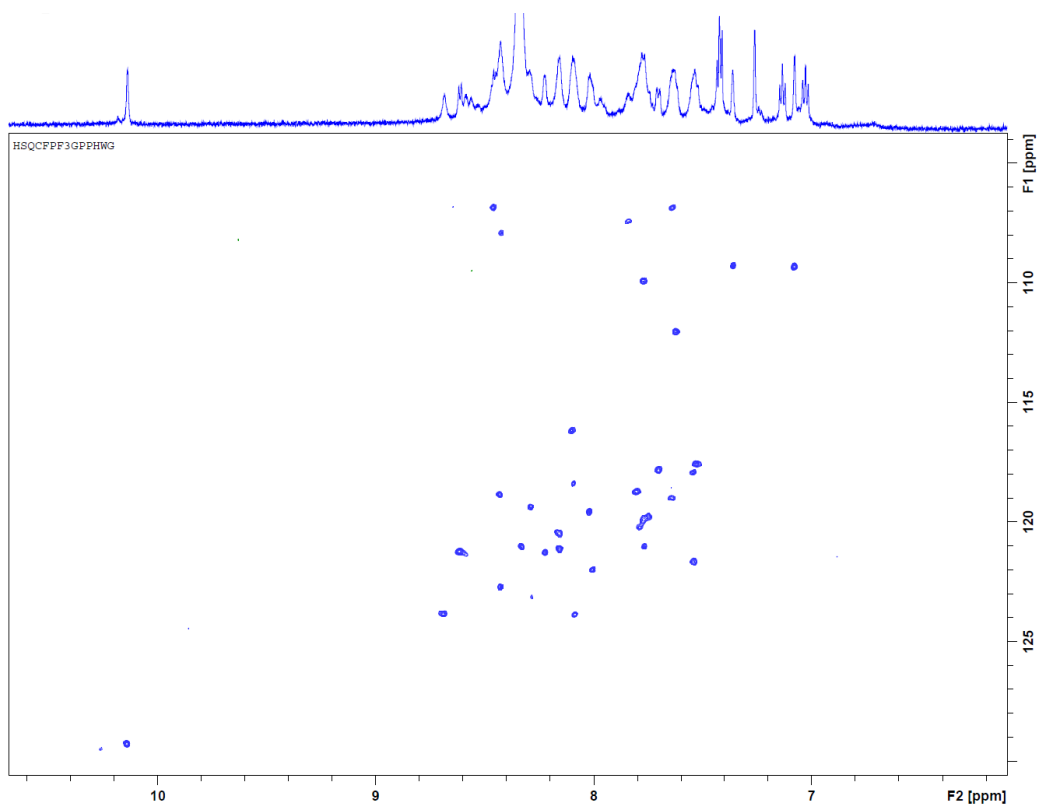

**Figure S5.**  $^{15}\text{N}$ -HSQC (at natural abundance) of turgencin  $\text{A}_{\text{Mox1}}$  in water.

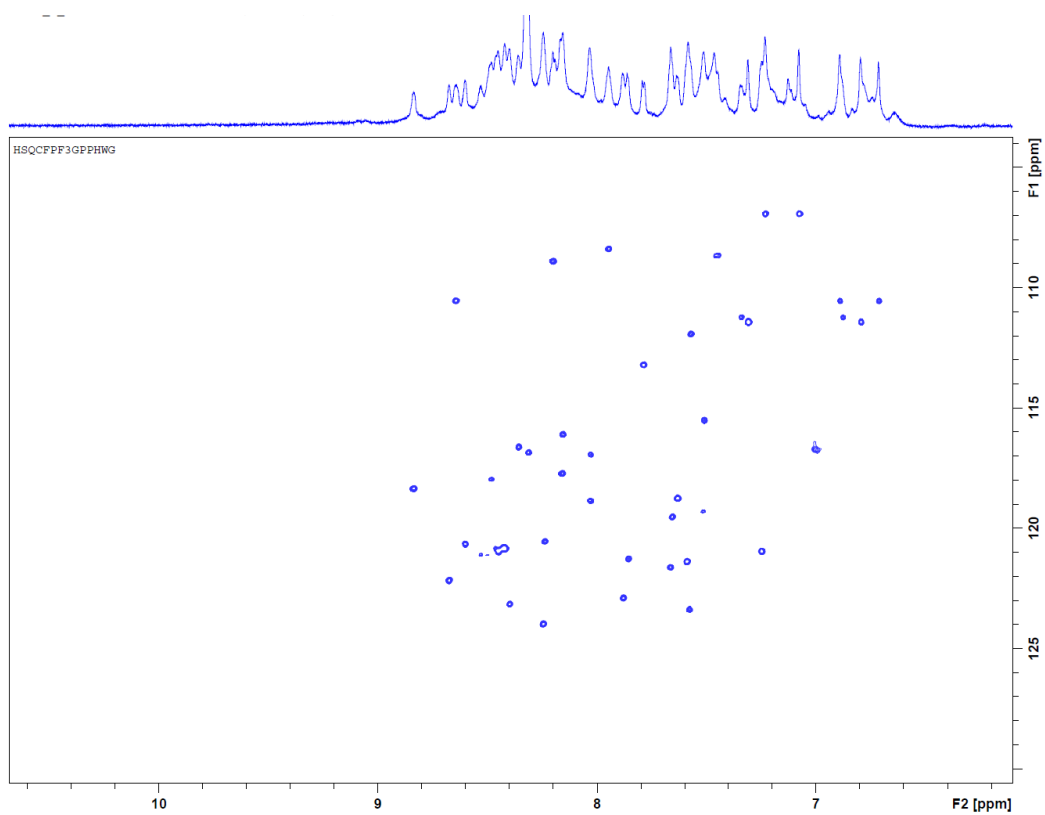

**Figure S6.**  $^{15}\text{N}$ -HSQC (at natural abundance) of turgencin  $\text{B}_{\text{Mox2}}$  in water.

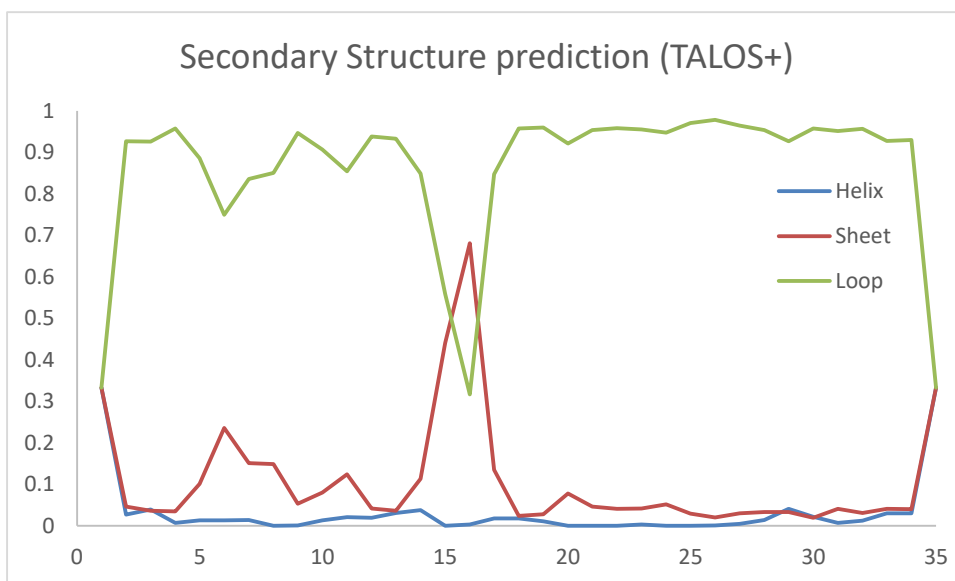

**Figure S7.** TALOS+ predicted secondary structure of turgencin B<sub>Mox2</sub> based on all available chemical shifts (HN, N, C, CA, CB, HA, HB). Overall patch of secondary fold is predicted. One residue (C16) is predicted as  $\beta$ -sheet with low confidence, however this is likely an effect of the disulfide bond affecting the chemical shifts.

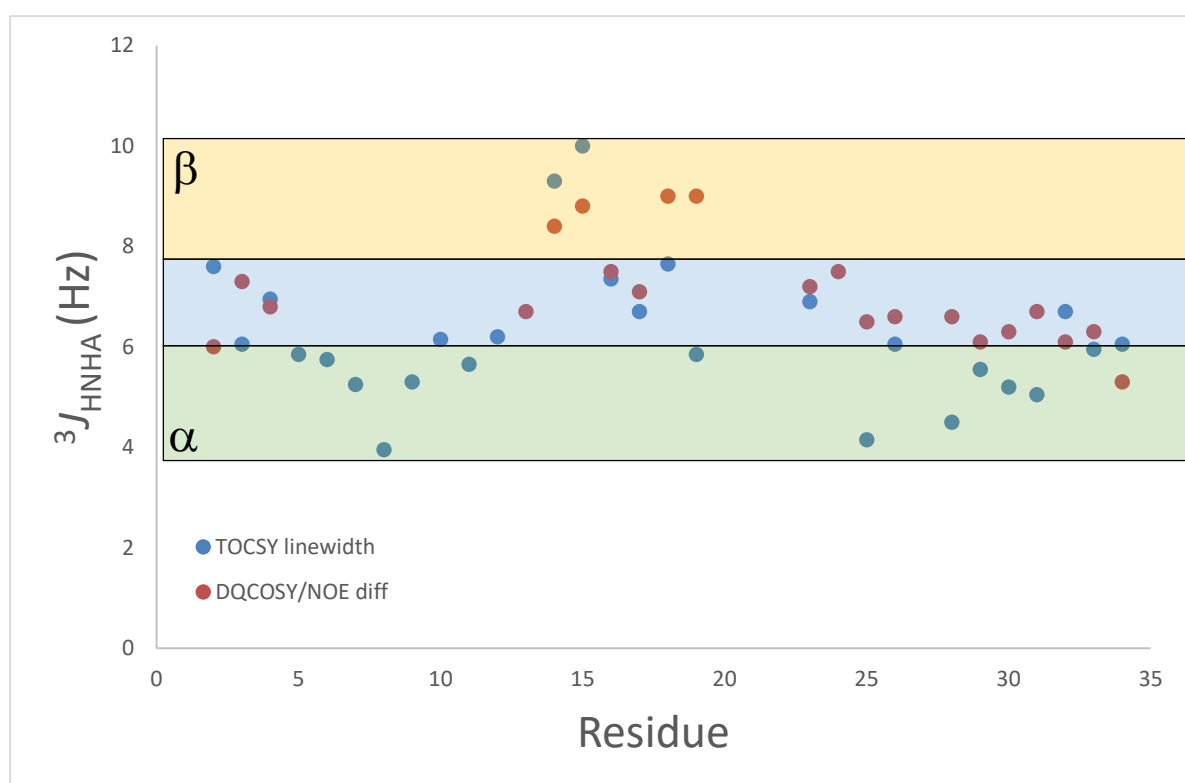

**Figure S8.** The  $^3J_{\text{HNHA}}$  coupling constants for turgencin B<sub>Mox2</sub> structure estimated using two methods using the TOCSY line widths and the sum/diff displacement of DQF-COSY and NOESY slices. The results indicate access to helical structures (green area) for both sides of the turn, but the couplings also suggest significant conformational averaging (blue area).

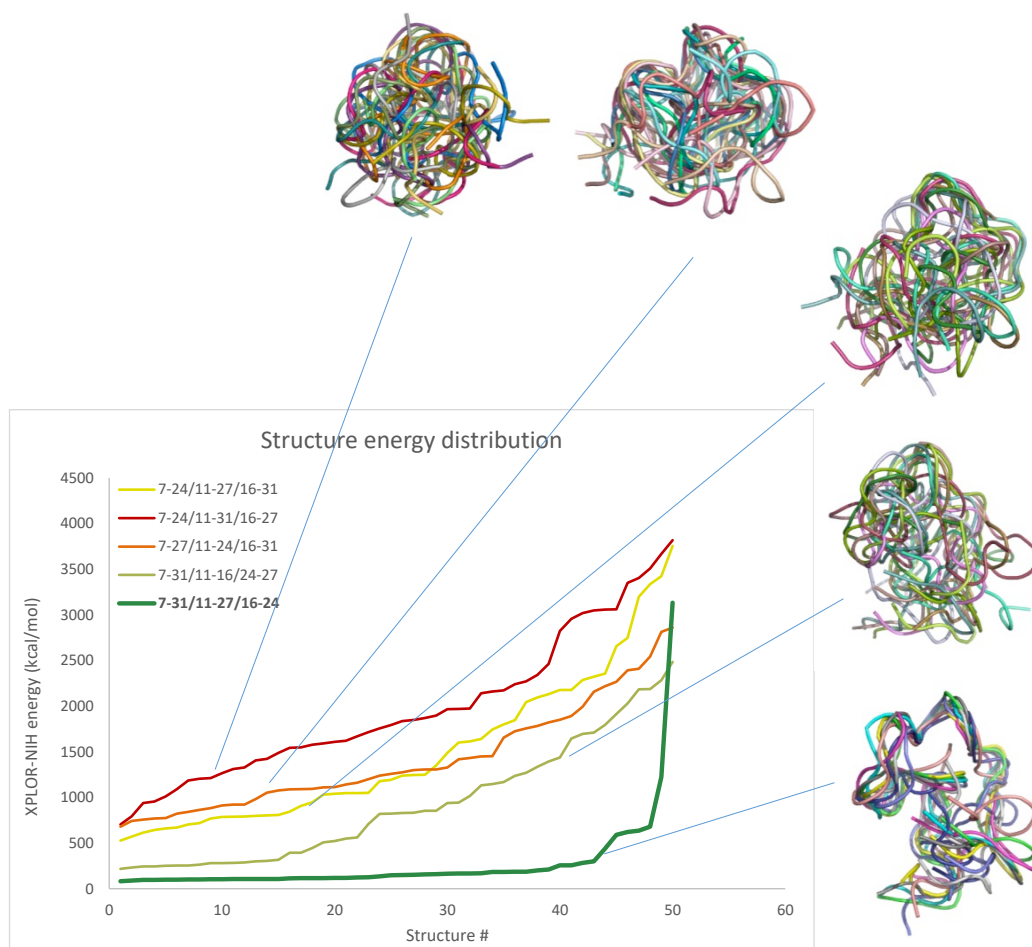

**Figure S9.** Early test calculations of turgencin  $B_{Mox2}$  using crude constraints to evaluate different disulfide patterns using crude constraints. 10 out of 50 structures of each simulation are superimposed, picked at even intervals from the energy profile.

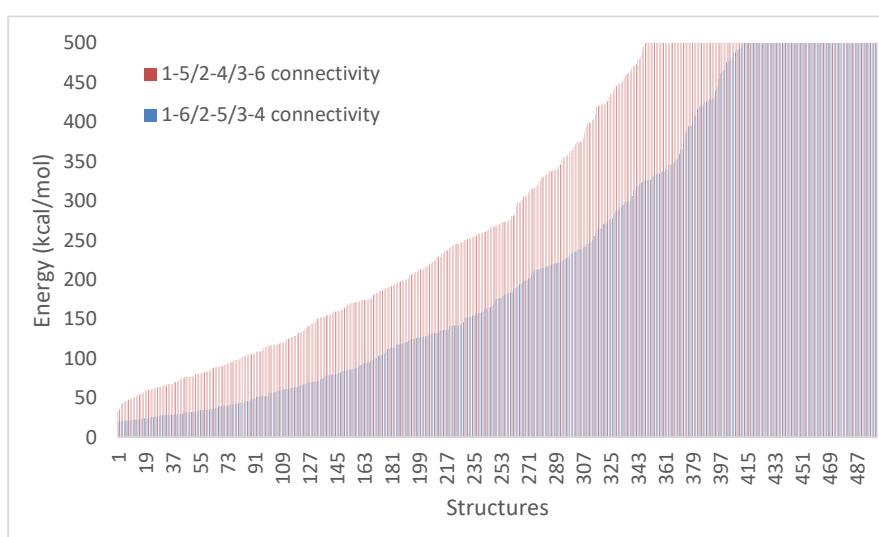

**Figure S10.** The most viable alternative disulfide pattern of turgencin  $B_{Mox2}$  compared to the found pattern in terms of energy of 500 calculated simulated annealing structures using the final constraints.

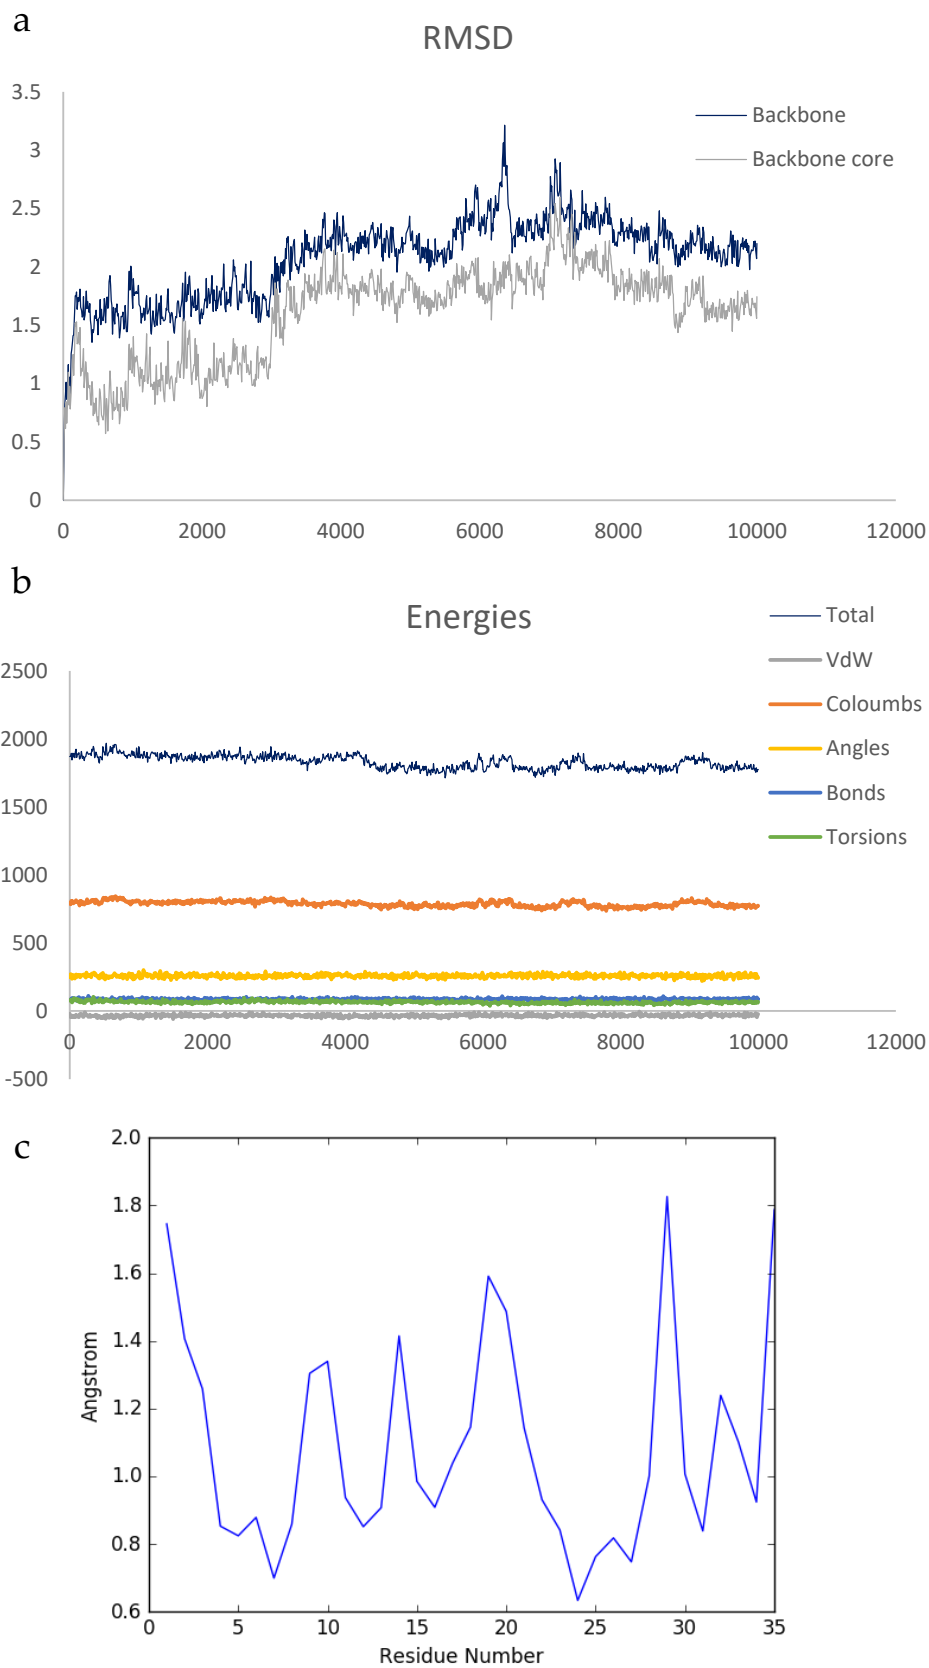

**Figure S11.** The (a) RMSD relative to the starting frame, (b) energies of turgencin B<sub>Mox2</sub> and (c) the RMSF of the backbone during the free MD trajectory.

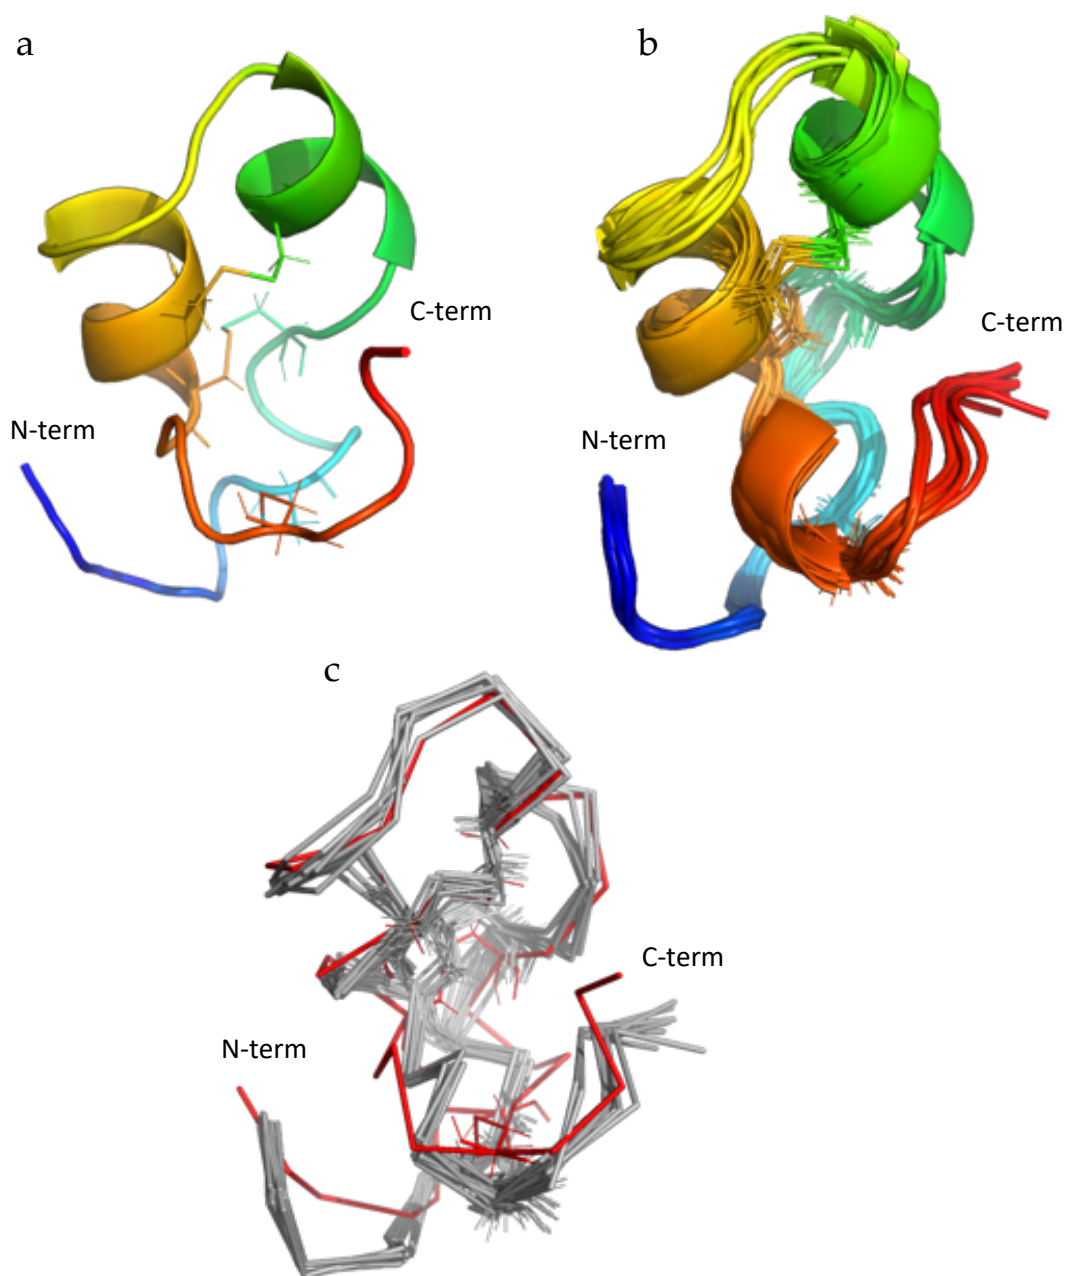

**Figure S12.** Comparison of NMR and molecular dynamics structures for turgencin B<sub>Mox2</sub>. (a) The representative NMR structure of turgencin B<sub>Mox2</sub> selected for MD simulations, and (b) an ensemble sampling the last nanosecond of the simulation. Backbone core (res 6-32) RMSD ~ 1.5 Å. (c) The NMR and MD structures superimposed and displayed with ribbons.



**Table S1.** Antimicrobial activity of solid phase extract (SPE) fractions and the organic extract. Bacterial test strains: *C. g.* - *Corynebacterium glutamicum*, *B. s.* - *Bacillus subtilis*, *S. a.* - *Staphylococcus aureus*, *E. c.* - *Escherichia coli*, *P. a.* - *Pseudomonas aeruginosa*.

| Extract      | Antimicrobial activity (MIC; mg/mL) |              |              |              |              |
|--------------|-------------------------------------|--------------|--------------|--------------|--------------|
|              | <i>C. g.</i>                        | <i>B. s.</i> | <i>S. a.</i> | <i>E. c.</i> | <i>P. a.</i> |
| 10% MeCN SPE | 1.25                                | 5.00         | 5.00         | 10.00        | 5.00         |
| 20% MeCN SPE | 2.50                                | 2.50         | 5.00         | 5.00         | 5.00         |
| 30% MeCN SPE | 0.16                                | 0.16         | 2.50         | 5.00         | 5.00         |
| 40% MeCN SPE | 0.04                                | 0.08         | 2.50         | 5.00         | 2.50         |
| 80% MeCN SPE | 0.31                                | 0.31         | 2.50         | 5.00         | 2.50         |
| Organic      | 2.50                                | 2.50         | 10.00        | >10.00       | >10.00       |

**Table S2.** Calculated and measured monoisotopic  $m/z$   $[M+4H]^{4+}$  ions of turgencin A, turgencin B, and their oxidized derivatives.

| Peptide                     | Calculated monoisotopic mass $[M+4H]^{4+}$ | Measured monoisotopic mass $[M+4H]^{4+}$ | Error (ppm) |
|-----------------------------|--------------------------------------------|------------------------------------------|-------------|
| Turgencin A                 | 923.4568                                   | 923.4574                                 | 0.65        |
| Turgencin A <sub>Mox1</sub> | 927.4555                                   | 927.4562                                 | 0.71        |
| Turgencin B                 | 885.6526                                   | 885.6536                                 | 1.11        |
| Turgencin B <sub>Mox1</sub> | 889.6529                                   | 889.6532                                 | 0.34        |
| Turgencin B <sub>Mox2</sub> | 893.6501                                   | 893.6518                                 | 1.92        |

**Table S3.** Proton chemical shift assignments for turgencin A<sub>Mox1</sub> in water.

| Residue           | H (ppm) | H $\alpha$ (ppm) | H $\beta$ (ppm) | H $\gamma$ (ppm)                 | Others (ppm)                                                                                               |
|-------------------|---------|------------------|-----------------|----------------------------------|------------------------------------------------------------------------------------------------------------|
| GLY <sub>1</sub>  | 8.56    | 3.91/3.92        |                 |                                  |                                                                                                            |
| PRO <sub>2</sub>  |         | 4.38             | 2.24/1.84       | 2.00/1.94                        | $\alpha$ :3.50/3.52                                                                                        |
| LYS <sub>3</sub>  | 8.61    | 4.32             | 1.80/1.70       | 1.39/1.43                        | $\alpha$ :1.57/1.58, $\alpha$ :2.90                                                                        |
| THR <sub>4</sub>  | 7.62    | 4.34             | 4.41            | 1.18                             |                                                                                                            |
| LYS <sub>5</sub>  | 8.68    | 3.97             | 1.82/1.74       | 1.38/1.40                        | $\alpha$ :1.66, $\alpha$ :2.94                                                                             |
| ALA <sub>6</sub>  | 8.34    | 3.99             | 1.34            |                                  |                                                                                                            |
| ALA <sub>7</sub>  | 8.00    | 4.12             | 1.39            |                                  |                                                                                                            |
| CYS <sub>8</sub>  | 8.16    | 4.18             | 3.39/2.96       |                                  |                                                                                                            |
| LYS <sub>9</sub>  | 8.58    | 3.66             | 1.80/1.69       | 1.23/1.22                        | $\alpha$ :1.58/1.56, $\alpha$ :2.90                                                                        |
| MET <sub>10</sub> | 8.16    | 4.12             | 2.25            | 2.94/2.86                        | $\alpha$ : 1.57, $\alpha$ : 2.62                                                                           |
| ALA <sub>11</sub> | 7.96    | 4.14             | 1.49            |                                  |                                                                                                            |
| CYS <sub>12</sub> | 8.10    | 4.45             | 3.06/3.12       |                                  |                                                                                                            |
| LYS <sub>13</sub> | 8.08    | 3.72             | 1.99/1.88       | 1.29                             | $\alpha$ :1.55, $\alpha$ :2.86                                                                             |
| LEU <sub>14</sub> | 7.63    | 4.07             | 1.70/1.55       | 1.68                             | $\alpha$ 1:0.78, $\alpha$ 2:0.83                                                                           |
| ALA <sub>15</sub> | 7.77    | 4.31             | 1.41            |                                  |                                                                                                            |
| THR <sub>16</sub> | 7.77    | 4.39             | 4.06            | 1.04                             |                                                                                                            |
| CYS <sub>17</sub> | 8.29    | 4.21             | 3.21/2.81       |                                  |                                                                                                            |
| GLY <sub>18</sub> | 8.43    | 3.77/3.74        |                 |                                  |                                                                                                            |
| LYS <sub>19</sub> | 7.80    | 4.26             | 1.81/1.67       | 1.36/1.41                        | $\alpha$ :1.59, $\alpha$ :2.91                                                                             |
| LYS <sub>20</sub> | 7.70    | 4.75             | 1.75/1.64       | 1.26                             | $\alpha$ :1.63, $\alpha$ :2.90                                                                             |
| PRO <sub>21</sub> |         | 4.74             | 1.89/2.38       | 1.99/1.90                        | $\alpha$ :3.58/3.34                                                                                        |
| GLY <sub>22</sub> | 8.46    | 3.67/4.01        |                 |                                  |                                                                                                            |
| GLY <sub>23</sub> | 7.64    | 3.76/4.15        |                 |                                  |                                                                                                            |
| TRP <sub>24</sub> | 8.42    | 4.34             | 3.36/3.18       |                                  | $\alpha$ 1:7.26, $\alpha$ 1:10.13, $\alpha$ 3:7.43,<br>$\alpha$ 2:7.13, $\alpha$ 2: 7.41, $\alpha$ 3: 7.02 |
| LYS <sub>25</sub> | 8.02    | 3.54             | 1.42/1.26       | 0.89/0.84                        | $\alpha$ :1.40, $\alpha$ :2.80                                                                             |
| CYS <sub>26</sub> | 4.17    | 3.01/2.97        |                 |                                  |                                                                                                            |
| LYS <sub>27</sub> | 7.78    | 3.96             | 1.74/1.80       | 1.37/1.29                        | $\alpha$ :1.54, $\alpha$ :2.84                                                                             |
| LEU <sub>28</sub> | 8.09    | 3.92             | 1.46/1.41       | 1.44                             | $\alpha$ :0.78/0.74                                                                                        |
| CYS <sub>29</sub> | 7.77    | 4.15             | 3.34/2.98       |                                  |                                                                                                            |
| GLU <sub>30</sub> | 8.43    | 3.69             | 2.06/1.88       | 1.90/2.60                        |                                                                                                            |
| LEU <sub>31</sub> | 8.22    | 4.12             | 1.72/1.55       | 1.68                             | $\alpha$ :0.82/0.81                                                                                        |
| GLY <sub>32</sub> | 7.84    | 3.86/3.85        |                 |                                  |                                                                                                            |
| CYS <sub>33</sub> | 7.54    | 4.66             | 3.07/2.97       |                                  |                                                                                                            |
| ASP <sub>34</sub> | 7.74    | 4.47             | 2.68            |                                  |                                                                                                            |
| ALA <sub>35</sub> | 7.54    | 4.27             | 1.40            |                                  |                                                                                                            |
| VAL <sub>36</sub> | 7.53    | 3.98             | 2.08            | $\gamma$ 1:0.92, $\gamma$ 2:0.85 |                                                                                                            |

**Table S4.** Carbon chemical shift assignments for turgencin A<sub>MOx1</sub> in water.

| Residue           | N (ppm) | C $\alpha$ (ppm) | C $\beta$ (ppm) | C $\gamma$ (ppm) | Others (ppm)                                                                                                                                                                  |
|-------------------|---------|------------------|-----------------|------------------|-------------------------------------------------------------------------------------------------------------------------------------------------------------------------------|
| GLY <sub>1</sub>  | 109.48  | 40.56            |                 |                  |                                                                                                                                                                               |
| PRO <sub>2</sub>  |         | 60.50            | 29.59           | 24.34            | $\alpha$ :46.89                                                                                                                                                               |
| LYS <sub>3</sub>  | 121.19  | 53.92            | 30.14           | 22.24            | $\alpha$ :26.21, $\alpha$ :39.33                                                                                                                                              |
| THR <sub>4</sub>  | 111.99  | 58.48            | 68.09           | 19.07            |                                                                                                                                                                               |
| LYS <sub>5</sub>  | 123.81  | 57.34            | 29.02           | 22.26            | $\alpha$ :26.72, $\alpha$ :39.32                                                                                                                                              |
| ALA <sub>6</sub>  | 120.98  | 52.30            | 15.32           |                  |                                                                                                                                                                               |
| ALA <sub>7</sub>  | 121.95  | 52.09            | 15.47           |                  |                                                                                                                                                                               |
| CYS <sub>8</sub>  | 121.10  | 57.05            | 35.14           |                  |                                                                                                                                                                               |
| LYS <sub>9</sub>  | 121.30  | 57.72            | 30.13           | 24.40            | $\alpha$ :26.28, $\alpha$ :39.30                                                                                                                                              |
| MET <sub>10</sub> | 120.45  | 52.02            | 23.24           | 48.40            | $\alpha$ :26.3, $\alpha$ :36.80                                                                                                                                               |
| ALA <sub>11</sub> | 123.40  | 52.42            | 14.53           |                  |                                                                                                                                                                               |
| CYS <sub>12</sub> | 116.13  | 54.33            | 35.66           |                  |                                                                                                                                                                               |
| LYS <sub>13</sub> | 123.81  | 56.97            | 29.22           | 22.05            | $\alpha$ :26.27, $\alpha$ :39.18                                                                                                                                              |
| LEU <sub>14</sub> | 118.52  | 53.97            | 39.30           | 24.20            | $\alpha$ 1:20.19, $\alpha$ 2:21.16                                                                                                                                            |
| ALA <sub>15</sub> | 120.99  | 50.92            | 16.46           |                  |                                                                                                                                                                               |
| THR <sub>16</sub> | 109.91  | 61.20            | 66.78           | 18.18            |                                                                                                                                                                               |
| CYS <sub>17</sub> | 119.35  | 55.29            | 40.47           |                  |                                                                                                                                                                               |
| GLY <sub>18</sub> | 118.81  | 43.86            |                 |                  |                                                                                                                                                                               |
| LYS <sub>19</sub> | 118.69  | 54.01            | 30.64           | 22.21            | $\alpha$ :26.29, $\alpha$ :39.33                                                                                                                                              |
| LYS <sub>20</sub> | 117.80  | 50.79            | 30.37           | 22.04            | $\alpha$ :26.25, $\alpha$ :39.34                                                                                                                                              |
| PRO <sub>21</sub> |         | 61.75            | 28.76           | 24.43            | $\alpha$ :47.84                                                                                                                                                               |
| GLY <sub>22</sub> | 106.81  | 42.12            |                 |                  |                                                                                                                                                                               |
| GLY <sub>23</sub> | 106.85  | 42.17            |                 |                  |                                                                                                                                                                               |
| TRP <sub>24</sub> | 122.69  | 57.01            | 25.95           | 108.03           | $\alpha$ 1:124.59,<br>$\alpha$ 2:126.89,<br>$\alpha$ 2:126.20,<br>$\alpha$ 3:117.93,<br>$\alpha$ 2:121.91,<br>$\alpha$ 2:112.01,<br>$\alpha$ 3:119,26,<br>N $\alpha$ 1:129.22 |
| LYS <sub>25</sub> | 119.54  | 56.94            | 28.99           | 22.57            | $\alpha$ :26.31, $\alpha$ :39.15                                                                                                                                              |
| CYS <sub>26</sub> | 118.96  | 55.75            | 36.82           |                  |                                                                                                                                                                               |
| LYS <sub>27</sub> | 120.16  | 56.37            | 29.55           | 22.18            | $\alpha$ :26.125, $\alpha$ :39.22                                                                                                                                             |
| LEU <sub>28</sub> | 118.33  | 54.77            | 39.04           | 23.94            | $\alpha$ :21.82/20.81                                                                                                                                                         |
| CYS <sub>29</sub> | 119.87  | 52.41            | 35.34           |                  |                                                                                                                                                                               |
| GLU <sub>30</sub> | 107.90  | 57.71            | 26.49           | 34.96            |                                                                                                                                                                               |
| LEU <sub>31</sub> | 121.21  | 54.92            | 39.28           | 24.20            | $\alpha$ :22.07                                                                                                                                                               |

|                          |        |       |       |                                    |  |
|--------------------------|--------|-------|-------|------------------------------------|--|
| <b>GLY</b> <sub>32</sub> | 107.37 | 43.87 |       |                                    |  |
| <b>CYS</b> <sub>33</sub> | 117.92 | 56.11 | 33.55 |                                    |  |
| <b>ASP</b> <sub>34</sub> | 119.77 | 53.49 | 37.87 |                                    |  |
| <b>ALA</b> <sub>35</sub> | 121.58 | 50.23 | 16.27 |                                    |  |
| <b>VAL</b> <sub>36</sub> | 117.53 | 59.61 | 29.45 | $\gamma$ 1:17.82, $\gamma$ 2:18.46 |  |

**Table S5.** Proton chemical shift assignments for turgencin B<sub>Mox2</sub> in water.

| Residue                  | H (ppm) | H $\alpha$ (ppm) | H $\beta$ (ppm) | H $\gamma$ (ppm)                   | Others (ppm)                                                      |
|--------------------------|---------|------------------|-----------------|------------------------------------|-------------------------------------------------------------------|
| <b>GLY</b> <sub>1</sub>  | 7.63    | 3.65, 3.77       | -               | -                                  | -                                                                 |
| <b>ILE</b> <sub>2</sub>  | 8.65    | 3.94             | 1.79            | 1.19, 1.42, CH <sub>3</sub> : 0.86 | $\delta$ CH <sub>3</sub> : 0.81                                   |
| <b>LYS</b> <sub>3</sub>  | 8.43    | 3.88             | 1.67, 1.76      | 1.32, 1.47                         | $\delta$ CH <sub>2</sub> :1.60, $\epsilon$ CH <sub>2</sub> : 2.89 |
| <b>GLU</b> <sub>4</sub>  | 8.41    | 3.82             | 1.94, 1.98      | 2.17, 2.25                         | -                                                                 |
| <b>MET</b> <sub>5</sub>  | 8.01    | 4.20             | 2.21, 2.28      | 2.84, 3.01                         | $\epsilon$ CH <sub>3</sub> : 2.58                                 |
| <b>LEU</b> <sub>6</sub>  | 8.50    | 3.97             | 1.420, 1.749    | 1.74                               | $\delta$ CH <sub>3</sub> : 0.75, 0.77                             |
| <b>CYS</b> <sub>7</sub>  | 7.83    | 4.20             | 2.820, 3.254    | -                                  | -                                                                 |
| <b>ASN</b> <sub>8</sub>  | 8.57    | 4.20             | 2.701, 2.748    | -                                  | -                                                                 |
| <b>MET</b> <sub>9</sub>  | 8.22    | 4.14             | 2.24            | 2.73, 3.02                         | $\epsilon$ CH <sub>3</sub> : 2.57                                 |
| <b>ALA</b> <sub>10</sub> | 7.86    | 4.21             | 1.48            | -                                  | -                                                                 |
| <b>CYS</b> <sub>11</sub> | 8.01    | 4.27             | 3.04, 3.07      | -                                  | -                                                                 |
| <b>ALA</b> <sub>12</sub> | 8.22    | 3.73             | 1.42            | -                                  | -                                                                 |
| <b>GLN</b> <sub>13</sub> | 7.55    | 4.19             | 2.06, 2.20      | 2.40, 2.48                         | $\epsilon$ NH <sub>2</sub> : 6.85, 7.31                           |
| <b>THR</b> <sub>14</sub> | 7.43    | 4.50             | 4.26            | 1.16                               | -                                                                 |
| <b>VAL</b> <sub>15</sub> | 8.81    | 4.09             | 2.09            | 0.98, 1.04                         | -                                                                 |
| <b>CYS</b> <sub>16</sub> | 8.13    | 4.89             | 2.76, 3.31      | -                                  | -                                                                 |
| <b>LYS</b> <sub>17</sub> | 7.23    | 3.99             | 1.70            | 1.30                               | $\delta$ CH <sub>2</sub> :1.60, $\epsilon$ CH <sub>2</sub> : 2.90 |
| <b>LYS</b> <sub>18</sub> | 8.13    | 4.17             | 1.70, 1.80      | 1.31                               | $\delta$ CH <sub>2</sub> :1.60, $\epsilon$ CH <sub>2</sub> : 2.89 |
| <b>SER</b> <sub>19</sub> | 7.77    | 4.37             | 3.76, 3.83      | -                                  | -                                                                 |
| <b>GLY</b> <sub>20</sub> | 8.18    | 3.82, 4.12       | -               | -                                  | -                                                                 |
| <b>GLY</b> <sub>21</sub> | 8.62    | 3.85, 4.44       | -               | -                                  | -                                                                 |

|                          |      |            |            |            |                                                          |
|--------------------------|------|------------|------------|------------|----------------------------------------------------------|
| <b>PRO</b> <sup>22</sup> | -    | 4.26       | 1.87, 2.30 | 1.90, 1.98 | $\delta\text{CH}_2$ : 3.54, 3.68                         |
| <b>LEU</b> <sup>23</sup> | 8.46 | 4.09       | 1.34, 1.70 | 1.60       | $\delta\text{CH}_3$ : 0.80, 0.84                         |
| <b>CYS</b> <sup>24</sup> | 7.50 | 4.19       | 3.16, 3.21 | -          | -                                                        |
| <b>ASP</b> <sup>25</sup> | 8.39 | 4.25       | 2.62, 2.67 | -          | -                                                        |
| <b>THR</b> <sup>26</sup> | 8.34 | 3.86       | 4.08       | 1.17       | -                                                        |
| <b>CYS</b> <sup>27</sup> | 7.56 | 4.16       | 3.01, 3.36 | -          | -                                                        |
| <b>GLN</b> <sup>28</sup> | 8.29 | 3.93       | 1.99, 2.02 | 2.22, 2.61 | -                                                        |
| <b>ALA</b> <sup>29</sup> | 8.38 | 4.02       | 1.41       | -          | -                                                        |
| <b>ALA</b> <sup>30</sup> | 7.64 | 4.15       | 1.46       | -          | -                                                        |
| <b>CYS</b> <sup>31</sup> | 7.49 | 4.55       | 3.00, 3.08 | -          | -                                                        |
| <b>LYS</b> <sup>32</sup> | 7.63 | 4.03       | 1.79, 1.85 | 1.36, 1.49 | $\delta\text{CH}_2$ : 1.59, $\epsilon\text{CH}_2$ : 2.86 |
| <b>ALA</b> <sup>33</sup> | 7.57 | 4.21       | 1.37       | -          | -                                                        |
| <b>LEU</b> <sup>34</sup> | 7.61 | 4.15       | 1.45, 1.75 | 1.78       | $\delta\text{CH}_3$ : 0.78, 0.82                         |
| <b>GLY</b> <sup>35</sup> | 7.93 | 3.78, 3.87 | -          | -          | terminal-NH <sub>2</sub> : 7.05, 7.21                    |

**Table S6.** Carbon chemical shift assignments for turgencin B<sub>Mox2</sub> in water.

| Residue                  | N (ppm) | C $\alpha$ (ppm) | C $\beta$ (ppm) | C $\gamma$ (ppm) | Others (ppm)                                              |
|--------------------------|---------|------------------|-----------------|------------------|-----------------------------------------------------------|
| <b>GLY</b> <sub>1</sub>  | -       | 61.014           | -               | -                | -                                                         |
| <b>ILE</b> <sub>2</sub>  | 122.15  | 60.82            | 35.45           | 14.68, 25.64     | $\delta\text{CH}_3$ : 10.32                               |
| <b>LYS</b> <sub>3</sub>  | 120.82  | 57.24            | 29.27           | 22.65            | $\delta\text{CH}_2$ : 26.37 $\epsilon\text{CH}_2$ : 39.28 |
| <b>GLU</b> <sub>4</sub>  | 120.90  | 57.43            | 26.15           | 33.18            | -                                                         |
| <b>MET</b> <sub>5</sub>  | 118.83  | 55.76            | 23.13           | 48.73            | $\epsilon\text{CH}_3$ : 36.56                             |
| <b>LEU</b> <sub>6</sub>  | 121.07  | 55.31            | 38.68           | 23.92            | $\delta\text{CH}_3$ : 19.85, 22.68                        |
| <b>CYS</b> <sub>7</sub>  | 121.22  | 57.19            | 32.11           | -                | -                                                         |
| <b>ASN</b> <sub>8</sub>  | 120.64  | 54.04            | 35.91           | -                | -                                                         |
| <b>MET</b> <sub>9</sub>  | 120.49  | 55.60            | 22.93           | 47.84            | $\epsilon\text{CH}_3$ : 36.547                            |
| <b>ALA</b> <sub>10</sub> | 122.84  | 52.64            | 14.45           | -                | -                                                         |
| <b>CYS</b> <sub>11</sub> | 116.93  | 54.80            | 35.20           | -                | -                                                         |
| <b>ALA</b> <sub>12</sub> | 123.91  | 52.69            | 15.50           | -                | -                                                         |
| <b>GLN</b> <sub>13</sub> | 111.92  | 53.47            | 27.05           | 31.25            | $\delta\text{CO}$ : 177.40                                |
| <b>THR</b> <sub>14</sub> | 108.63  | 57.095           | 67.66           | 18.38            | -                                                         |
| <b>VAL</b> <sub>15</sub> | 118.30  | 61.24            | 29.56           | 17.42, 19.53     | -                                                         |
| <b>CYS</b> <sub>16</sub> | 116.07  | 52.91            | 41.12           | -                | -                                                         |

|                          |        |       |       |        |                                                    |
|--------------------------|--------|-------|-------|--------|----------------------------------------------------|
| <b>LYS</b> <sub>17</sub> | 120.89 | 56.09 | 30.06 | 22.133 | δCH <sub>2</sub> : 26.35 εCH <sub>2</sub> : 39.32  |
| <b>LYS</b> <sub>18</sub> | 117.66 | 54.22 | 29.95 | 22.18  | δCH <sub>2</sub> : 26.34 εCH <sub>2</sub> : 39.29  |
| <b>SER</b> <sub>19</sub> | 113.19 | 55.42 | 61.55 | -      | -                                                  |
| <b>GLY</b> <sub>20</sub> | 108.86 | 42.22 |       | -      | -                                                  |
| <b>GLY</b> <sub>21</sub> | 110.51 | 42.04 |       | -      | -                                                  |
| <b>PRO</b> <sub>22</sub> | -      | 62.77 | 29.46 | 24.59  | δCH <sub>2</sub> : 47.00                           |
| <b>LEU</b> <sub>23</sub> | 117.91 | 55.08 | 38.44 | 24.45  | δCH <sub>3</sub> : 20.31, 22.08                    |
| <b>CYS</b> <sub>24</sub> | 119.23 | 55.88 | 36.38 | -      | -                                                  |
| <b>ASP</b> <sub>25</sub> | 120.78 | 54.79 | 36.90 | -      | -                                                  |
| <b>THR</b> <sub>26</sub> | 116.55 | 63.82 | 66.02 | 18.78  | -                                                  |
| <b>CYS</b> <sub>27</sub> | 123.34 | 58.41 | 35.90 | -      | -                                                  |
| <b>GLN</b> <sub>28</sub> | 116.81 | 56.55 | 25.79 | 32.02  | -                                                  |
| <b>ALA</b> <sub>29</sub> | 123.12 | 52.24 | 15.11 | -      | -                                                  |
| <b>ALA</b> <sub>30</sub> | 121.61 | 51.88 | 14.65 | -      | -                                                  |
| <b>CYS</b> <sub>31</sub> | 115.49 | 52.02 | 32.63 | -      | -                                                  |
| <b>LYS</b> <sub>32</sub> | 119.51 | 55.41 | 29.82 | 22.31  | δCH <sub>2</sub> : 26.24, εCH <sub>2</sub> : 39.20 |
| <b>ALA</b> <sub>33</sub> | 121.34 | 50.37 | 15.71 | -      | -                                                  |
| <b>LEU</b> <sub>34</sub> | 118.72 | 53.19 | 39.37 | 23.84  | δCH <sub>3</sub> : 20.26, 23.08                    |
| <b>GLY</b> <sub>35</sub> | 108.32 | 42.36 | -     | -      | -                                                  |

**Table S7.** Peptides sharing the same disulfide connectivity as turgencin B (C1-C6/C2-C5/C3-C4).

| AMP           | #aa | Sequence and protein data bank (PDB) ID                                                              | Species                                               | Ref.                           |
|---------------|-----|------------------------------------------------------------------------------------------------------|-------------------------------------------------------|--------------------------------|
| Turgencin B   | 35  | GIKEMLCNMACAQTVCCKKSGGPLCDTCQAACKAL-NH <sub>2</sub>                                                  | <i>Synoicum turgens</i> (ascidian)                    | This work                      |
| TEWP          | 36  | pEKKCPGRCTLKCGKHERPTLPYNCGKYICCVPVKVK (PDB: 2B5B)                                                    | <i>Caretta caretta</i> (Loggerhead sea turtle)        | [1]                            |
| Pelovaterin   | 42  | DDTPSSRCGSGGWGPCLPVDLLCIVHVTVGCSGGFGCCRIG (PDB: 2JR3)                                                | <i>Pelodiscus sinensis</i> (Chinese softshell turtle) | [2]                            |
| Caenopore-5   | 81  | RSALSCQMCELVVKKYEGSADKDANVIKDFDAECKKLFHTIPFGTRECDHYVNSKVDPIIHELEGGTAPKDVCTKLNECP (PDB: 2JS9)         | <i>Caenorhabditis elegans</i> (nematode)              | [3]                            |
| NK-lysin      | 78  | GLICESCRKIIQKLEDMVGPQPNEDTVTQAASRVCDKMKILRGVCKKIMRTFLRRISKDILTGKKPQAIKVDIKICE (PDB: 1NKL)            | <i>Sus scrofa</i> (pig)                               | [4]                            |
| RTD-1         | 18  | GF <del>CRCLCRRGVCR</del> CIC <del>TR</del> (cyclic, 3 DSB + head to tail peptide bonds) (PDB: 2LYF) | <i>Macaca mulatta</i> (Rhesus monkey)                 | [5], [6]                       |
| Viscotoxin A3 | 46  | KSCCPNTTGRNIYNACRLTGAPRPTCAKLSCCKIISGSTCPSDY <del>PK</del> (PDB: 1ED0)                               | <i>Viscum album</i> (mistletoe)                       | [7] (sequence), [8] (activity) |

## References

1. Chattopadhyay, S.; Sinha, N. K.; Banerjee, S.; Roy, D.; Chattopadhyay, D.; Roy, S., Small cationic protein from a marine turtle has  $\beta$ -defensin-like fold and antibacterial and antiviral activity. *Proteins* **2006**, 64, 524-531.
2. Lakshminarayanan, R.; Vivekanandan, S.; Samy, R. P.; Banerjee, Y.; Chi-Jin, E. O.; Teo, K. W.; Jois, S. D. S.; Kini, R. M.; Valiyaveetil, S., Structure, self-assembly, and dual role of a  $\beta$ -defensin-like peptide from the Chinese soft-shelled turtle eggshell matrix. *J. Am. Chem. Soc.* **2008**, 130, 4660-4668.
3. Mysliwy, J.; Dingley, A. J.; Stanisak, M.; Jung, S.; Lorenzen, I.; Roeder, T.; Leippe, M.; Grötzinger, J., Caenopore-5: The three-dimensional structure of an antimicrobial protein from *Caenorhabditis elegans*. *Developmental & Comparative Immunology* **2010**, 34, 323-330.
4. Liepinsh, E.; Andersson, M.; Ruysschaert, J.-M.; Otting, G., Saposin fold revealed by the NMR structure of NK-lysin. *Nature Structural Biology* **1997**, 4, 793-795.
5. Tang, Y.-Q.; Yuan, J.; Ösapay, G.; Ösapay, K.; Tran, D.; Miller, C. J.; Ouellette, A. J.; Selsted, M. E., A cyclic antimicrobial peptide produced in primate leukocytes by the ligation of two truncated  $\alpha$ -defensins. *Science* **1999**, 286, 498-502.
6. Selsted, M. E.,  $\theta$ -defensins: Cyclic antimicrobial peptides produced by binary ligation of truncated  $\alpha$ -defensins. *Current Protein & Peptide Science* **2004**, 5, 365-371.
7. Romagnoli, S.; Ugolini, R.; Fogolari, F.; Schaller, G.; Urech, K.; Giannattasio, M.; Ragona, L.; Molinari, H., NMR structural determination of viscotoxin A3 from *Viscum album* L. *Biochem. J.* **2000**, 350, 569-577.
8. Giudici, A. M.; Regente, M. C.; Villalaín, J.; Pfüller, K.; Pfüller, U.; De La Canal, L., Mistletoe viscotoxins induce membrane permeabilization and spore death in phytopathogenic fungi. *Physiologia Plantarum* **2004**, 121, 2-7.
